# Supplementary material for: Virtual Scribes and Physician Time Spent on Electronic Health Records
Source: PubMed Central journal article supplement (PMC11127114; doi:10.1001/jamanetworkopen.2024.13140), 2024-05-24
Supplement: jamanetwopen-e2413140-s002.pdf [file jamanetwopen-e2413140-s002.pdf]

## Data Sharing Statement

Rotenstein. Virtual Scribes and Physician Time Spent on Electronic Health Records. *JAMA Netw Open*. Published May 24, 2024. doi:10.1001/jamanetworkopen.2024.13140

### Data

**Data available:** No

### Additional Information

**Explanation for why data not available:** This is proprietary health system data.
